# Supplementary material for: 4-Hydroxycoumarin Exhibits Antinociceptive and Anti-Inflammatory Effects Through Cytokine Modulation: An Integrated In Silico and In Vivo Study
Source: MDPI journal article supplement (doi:10.3390/ijms26062788), 2025-03-19

# 4-Hydroxycoumarin Exhibits Antinociceptive and Anti-Inflammatory Effects Through Cytokine Modulation: An Integrated In Silico and In Vivo Study

**Figure S1.** Amino acid interactions formed between 4-HC and celecoxib with COX-2.

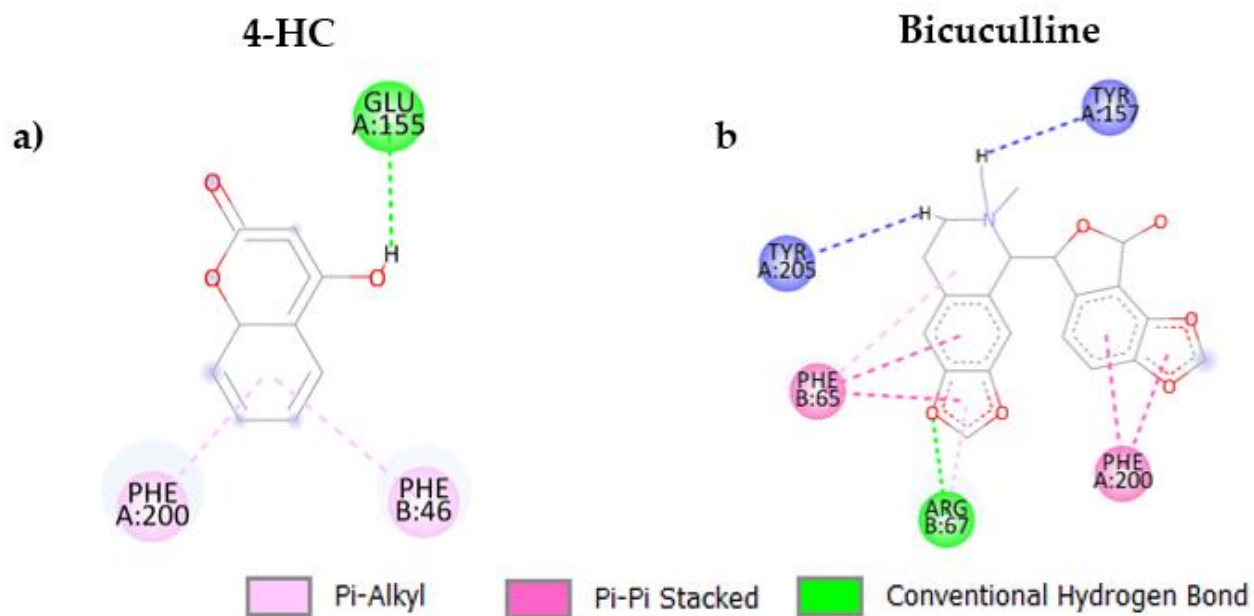

**Figure S2.** Amino acid interactions formed between 4-HC and bicuculline with GABA<sub>A</sub>.

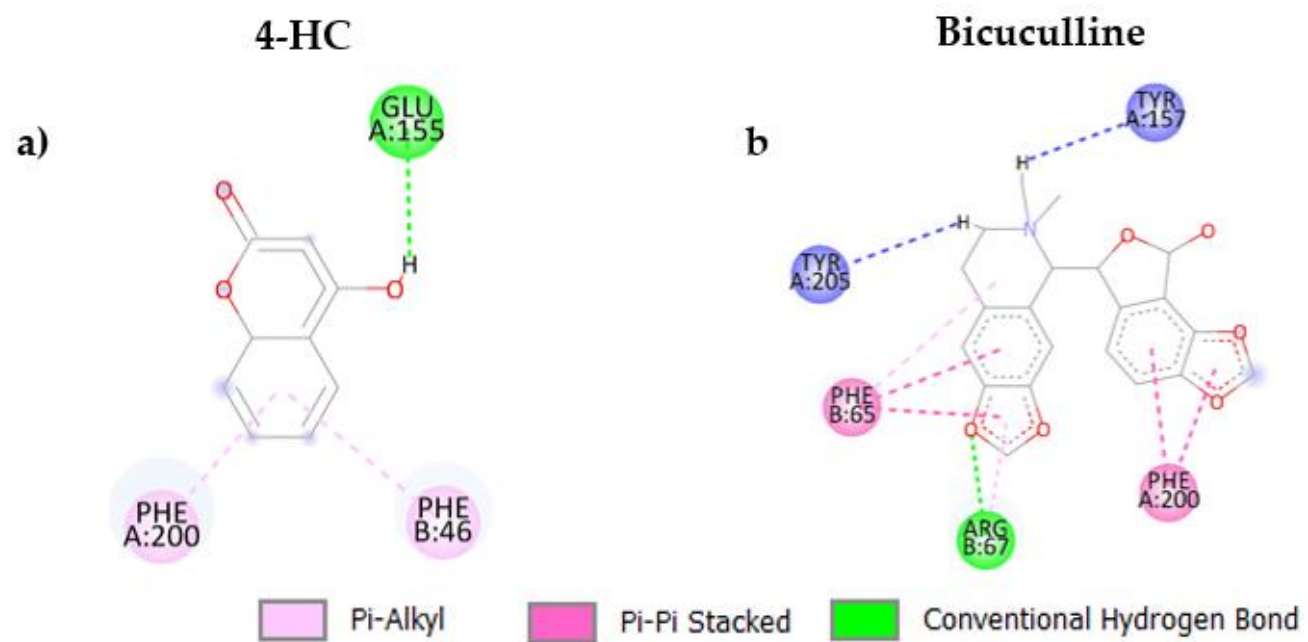

**Figure S3.** Amino acid interactions formed between 4-HC and 7-Nitroindazole with iNOS.

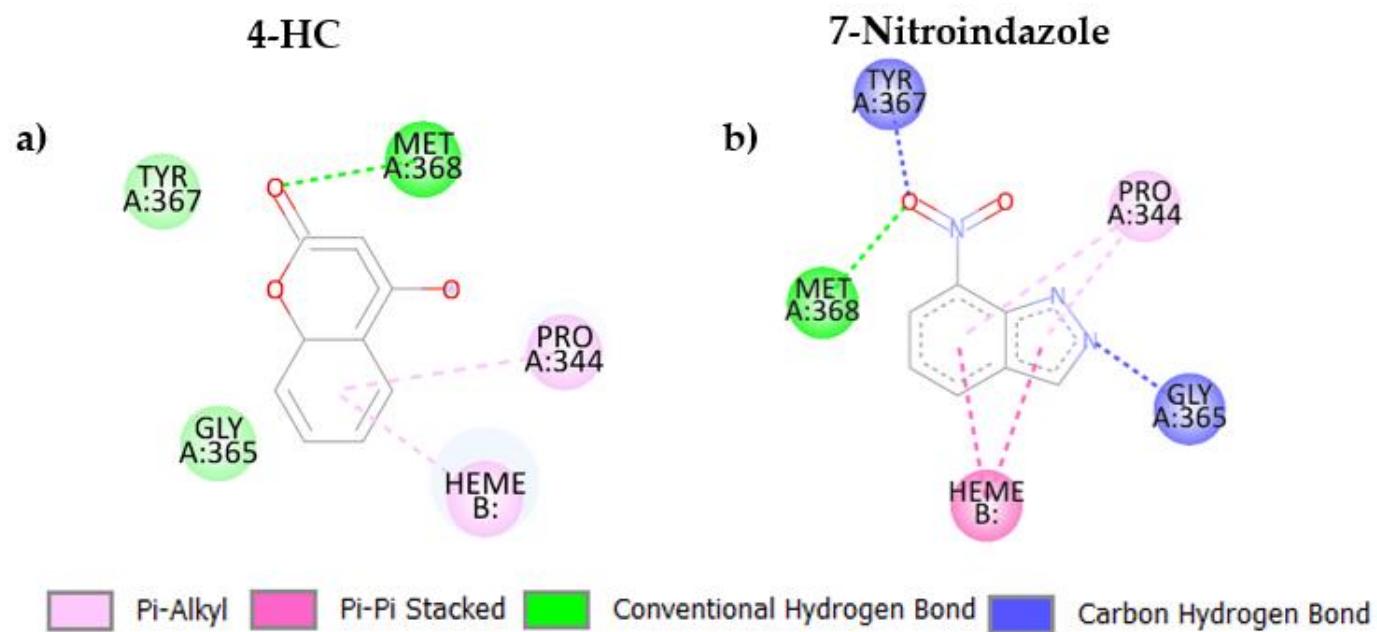

**Figure S4.** Amino acid interactions formed between 4-HC and dexamethasone with NFκB.

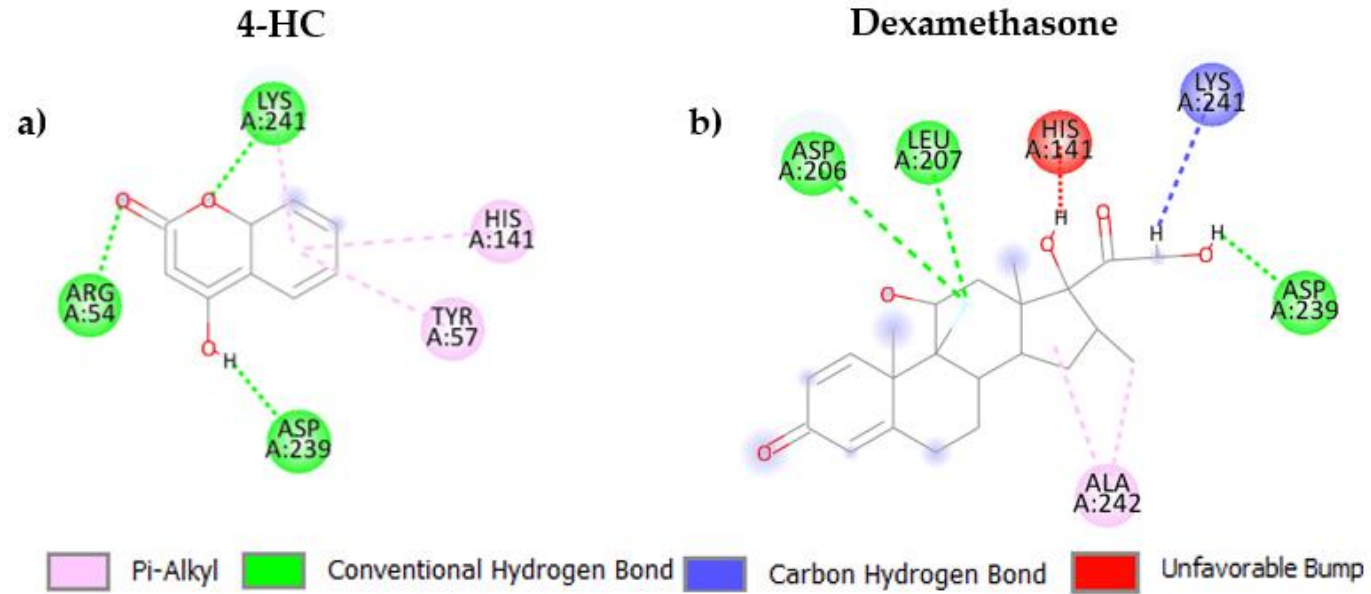

**Figure S5.** Amino acid interactions formed between 4-HC and morphine with  $\mu$ -opioid receptor.

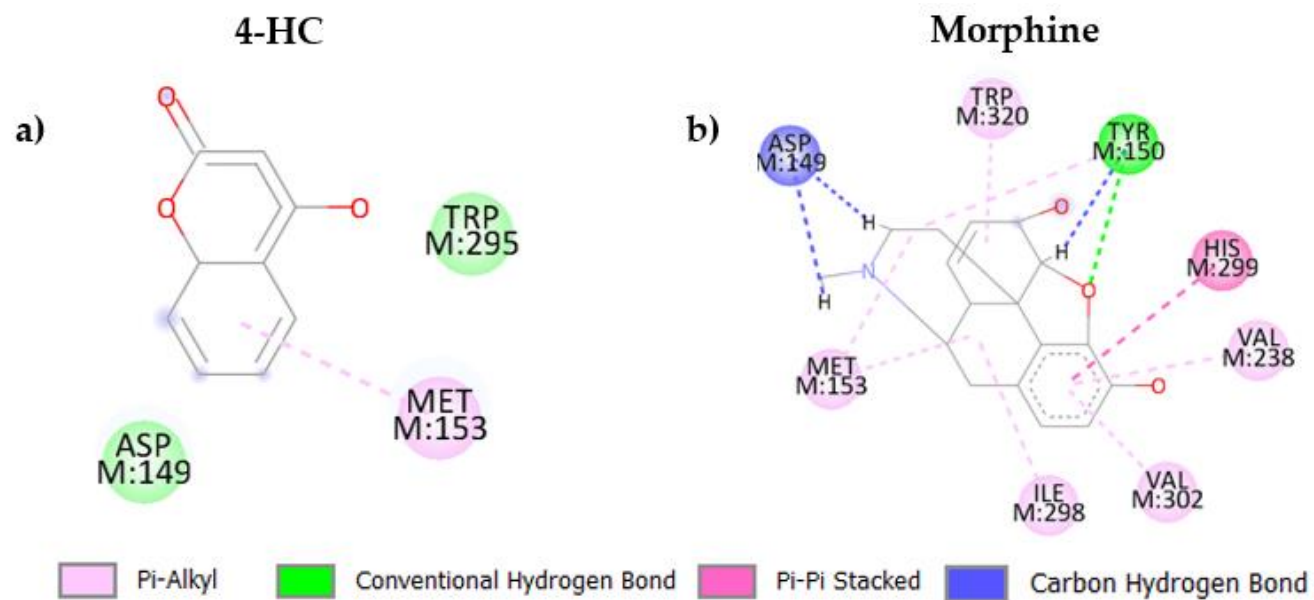

**Figure S6.** Amino acid interactions formed between 4-HC and sketamine with NMDA<sub>R</sub>.

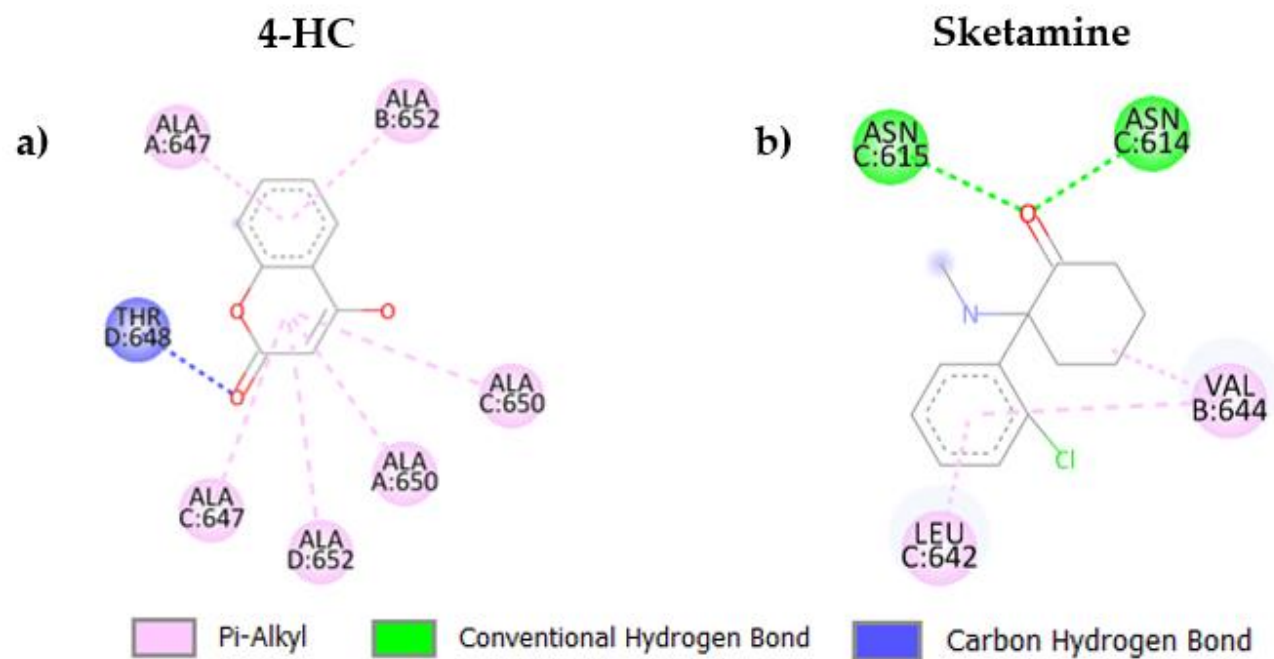

**Figure S7.** Amino acid interactions formed between 4-HC and capsazepine with TRPV1.

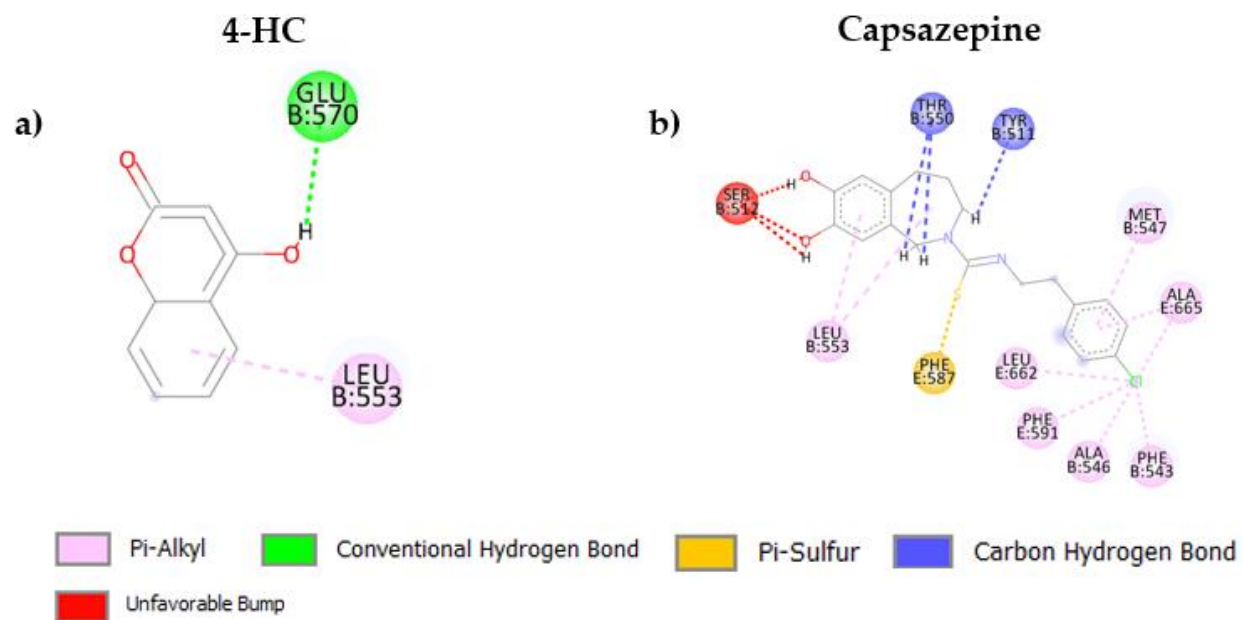

Supplement: s1 [file ijms-3501004-supplementary.pdf › ijms-3501004-supplementary.pdf]
